# Supplementary material
Source: publisher figshare collection journal article supplement (https://frontiersin.figshare.com/ndownloader/files/24783923)
Supplement: Supplementary file [file 24783923]

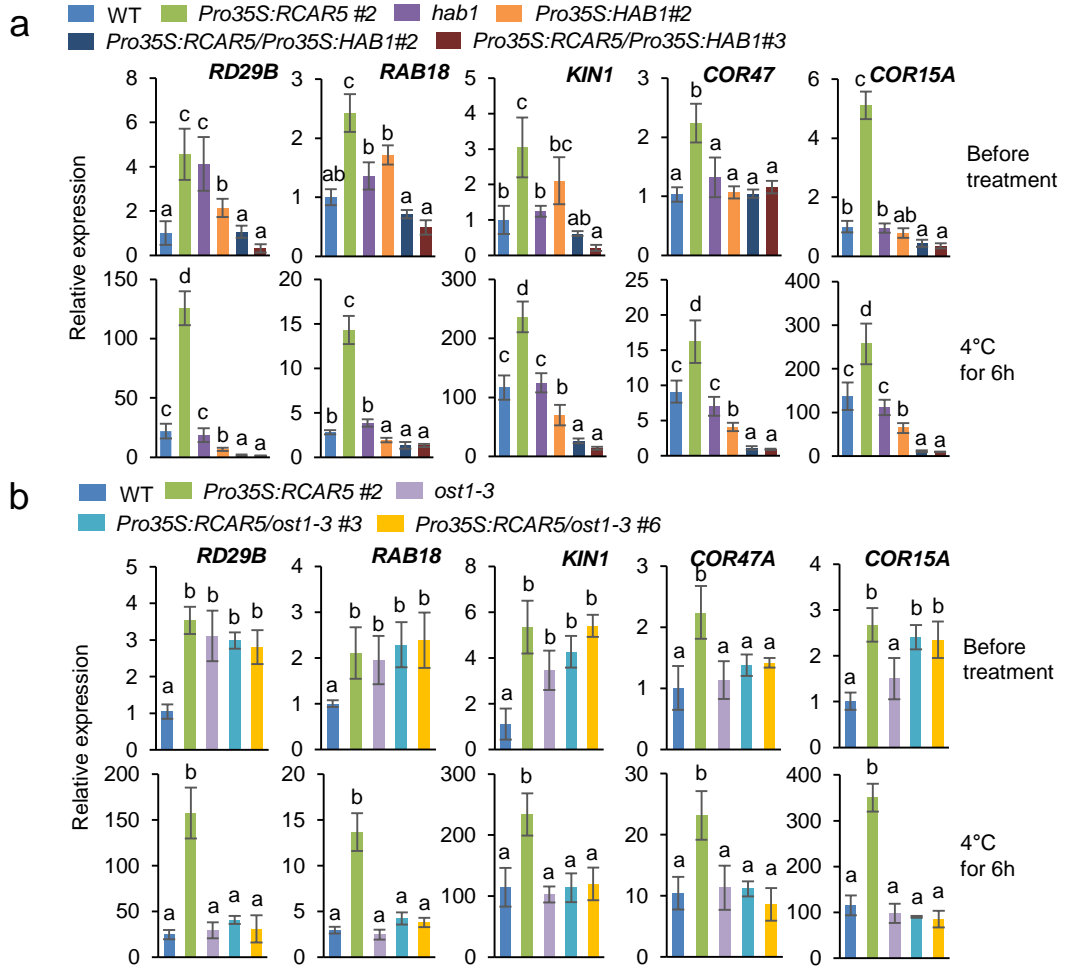

**FIGURE S12** Involvement of HAB1 and OST1 in strong upregulation of cold- and ABA-responsive genes in *Pro35S:RCAR5* under cold stress conditions. Two-week-old seedlings of *Pro35S:RCAR5* (a), *Pro35S:RCAR5/Pro35S:HAB1* (b), and WT plants were exposed to 4°C and shoots were harvested at the indicated time points. *Actin8* was used as an internal control for normalization. The expression level of each gene in WT was set to 1.0. Data represent mean  $\pm$  SD of three independent experiments. Different letters indicate significant differences between WT and transgenic plants (ANOVA;  $P < 0.05$ ).
